# Supplementary material for: Ultra-Sensitive NT-proBNP Quantification for Early Detection of Risk Factors Leading to Heart Failure
Source: MDPI journal article supplement (doi:10.3390/s17092116), 2017-09-14
Supplement: s1 [file s1]

# Ultra-sensitive NT-proBNP Test for Early Detection of Risk Factors Leading to Heart

## Failure

Keum-Soo Song, Satish Balasaheb Nimse, Mukesh Digambar Sonawane, Shrikant Dashrat Warkad and Taisun Kim\*

Institute for Applied Chemistry and Department of Chemistry, Hallym University, Chuncheon,

200-702, Korea; [tskim@hallym.ac.kr](mailto:tskim@hallym.ac.kr)

## Supporting Information

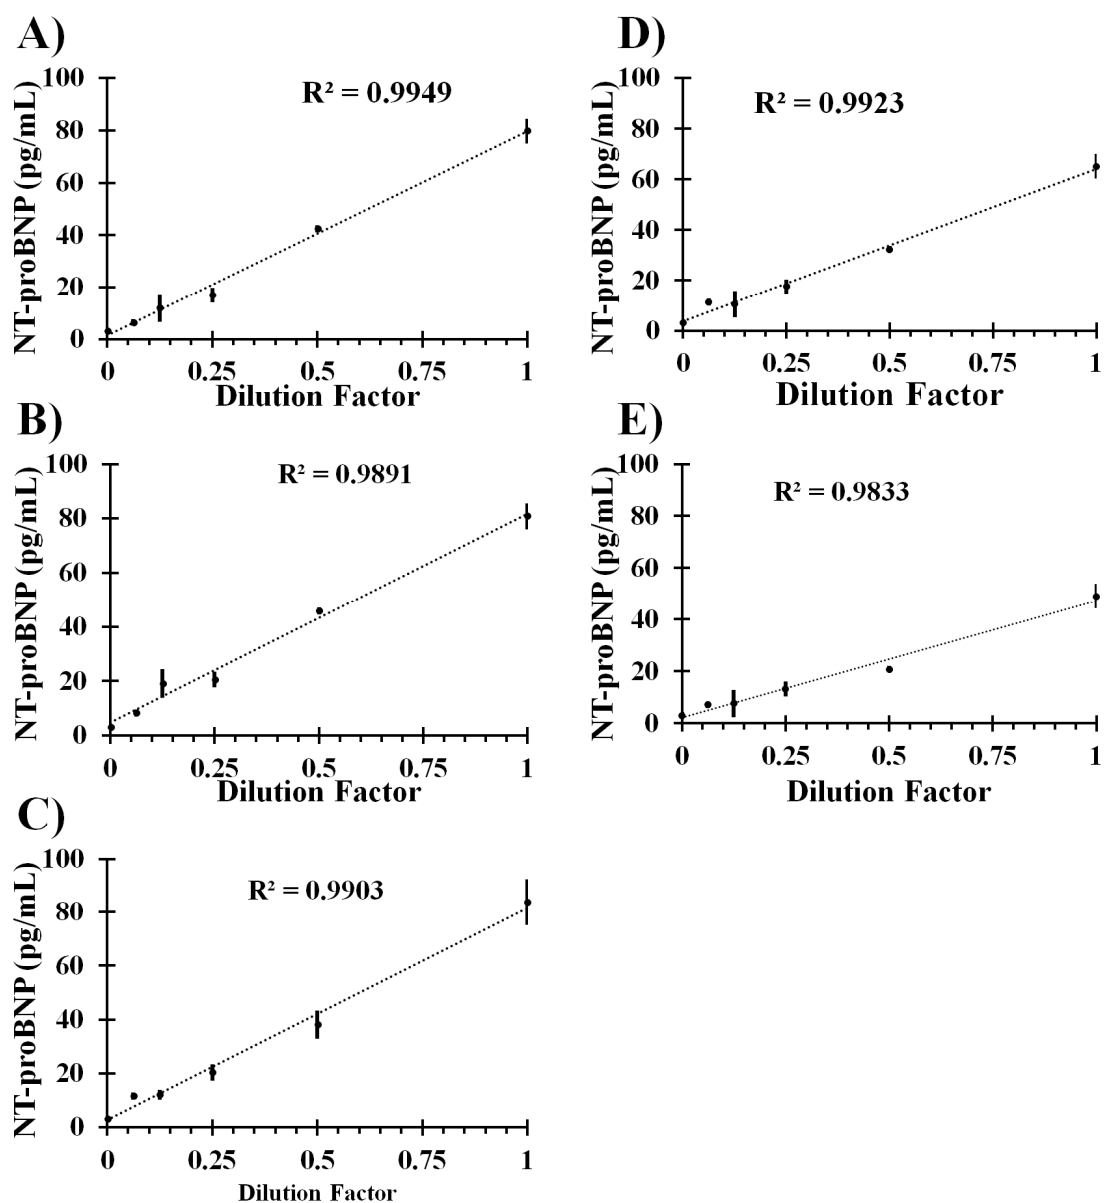

**Figure S1:** Linearity of test by dilution of non-spiked human serum samples containing A) 83.8pg/mL, B) 79.8 pg/mL, C) 65.2 pg/mL, D) 52.9 pg/mL, E) 49.1pg/mL NT-proBNP, respectively.
